# Supplementary material for: Probiotic-derived ferrichrome inhibits colon cancer progression via JNK-mediated apoptosis
Source: Springer Nature journal article supplement (doi:10.1038/ncomms12365), 2016-08-10
Supplement: 41467_2016_BFncomms12365_MOESM899_ESM.pdf [file 41467_2016_BFncomms12365_MOESM899_ESM.pdf]

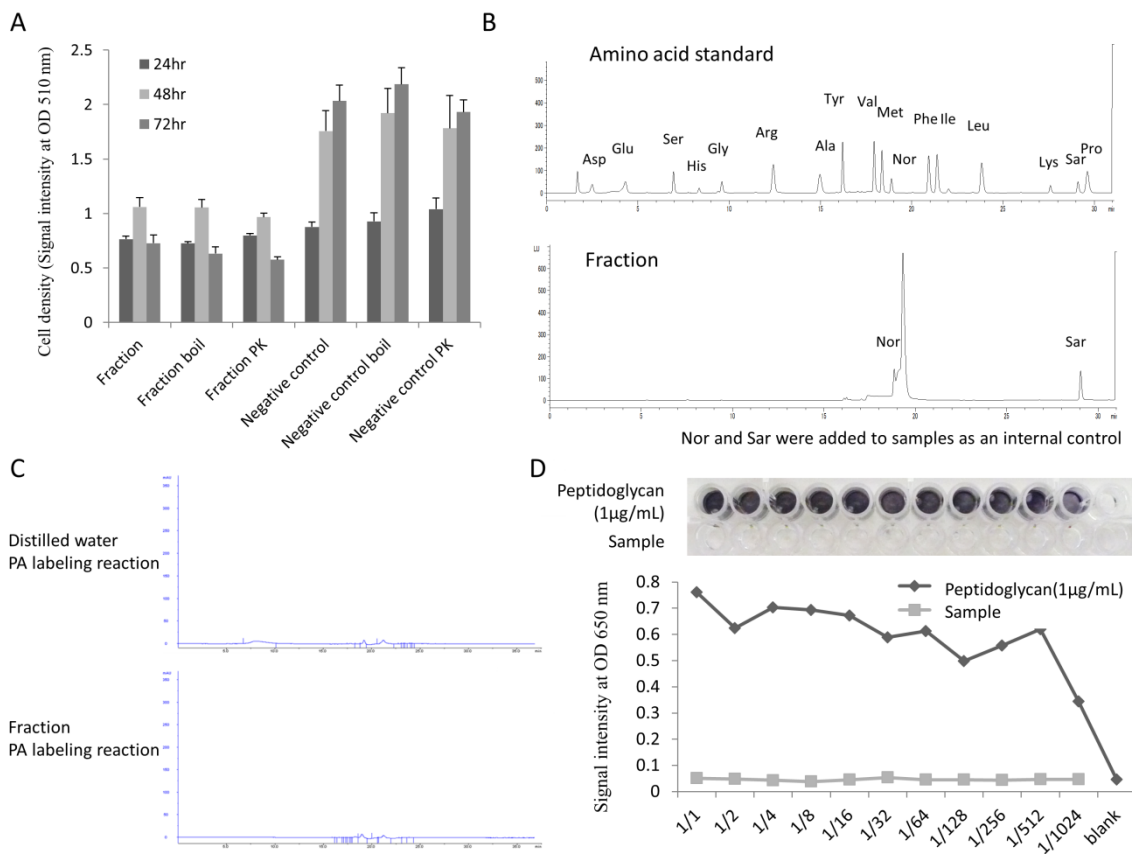

Supplementary Figure 1 A tumor-suppressive fraction separated from the culture supernatant of *L. casei* ATCC334, was not a protein, peptide glycan or a sugar chain

The tumor-suppressive fraction was heat- and protease K digestion-stable (A) (n=5). An amino acid analysis after the acid degradation of the tumor-suppressive fraction by HPLC (B). HPLC (using the PA labeling method) was performed to detect sugar chains (C). The peptide glycan content in the fraction. The peptide glycan concentration as measured by an SLP test (D).

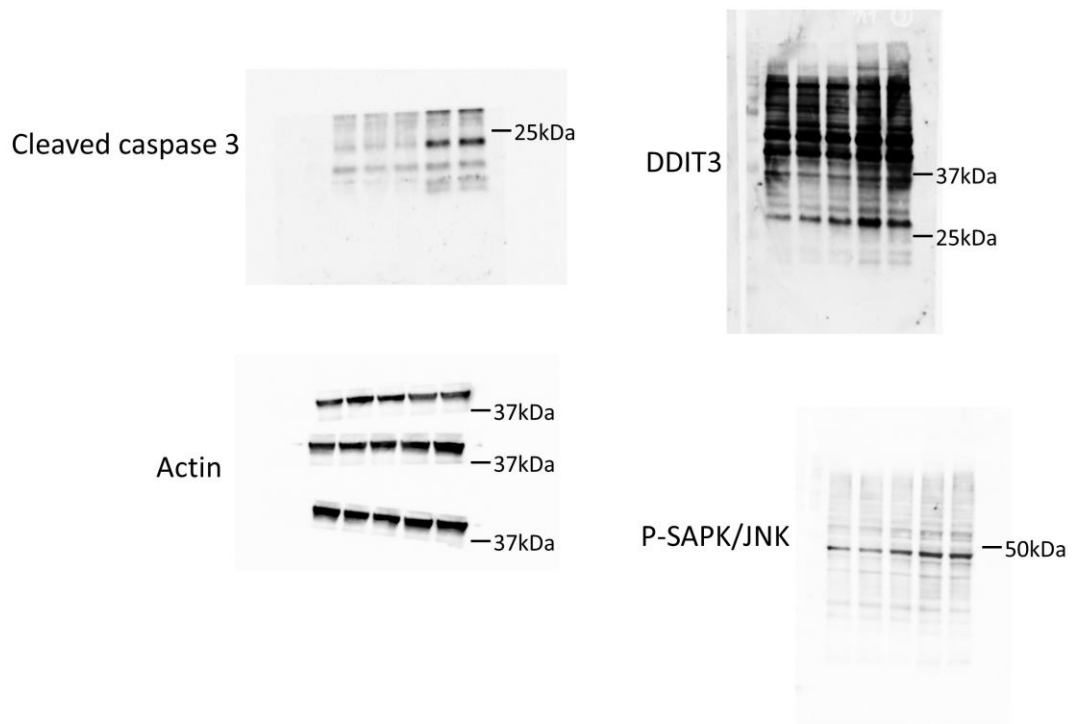

Supplementary Figure 2

Unprocessed original scans of western blots.

Supplementary Table 1 The anti-tumor effect of the ferrichrome-deprived supernatant of *L. casei* ATCC334

| % of growth inhibition |           |                    | % of growth inhibition |           |                    |
|------------------------|-----------|--------------------|------------------------|-----------|--------------------|
|                        | Average   | Standard deviation |                        | Average   | Standard deviation |
| Culture supernatant    | 65.55357  | 8.155791           | Ferrichrome            | 71.87869  | 8.266474           |
| IP-ARN1                | 42.42957* | 11.48358           | IP-ARN1                | 48.38782* | 6.747381           |
| IP-LCN2                | 38.11134* | 7.30429            | IP-LCN2                | 40.33055* | 5.574248           |

An SRB assay revealed that the tumor-suppressive effect of the culture supernatant of *L. casei* ATCC334 was reduced by treatment with ARN1 and LCN2 (A) (n=5). The tumor-suppressive effect of 100 ng/mL ferrichrome was reduced by treatment with ARN1 and LCN2 (B) (n=5). \*p<0.05 by Student's *t*-test.

Supplementary Table 2 The mRNAs selected by a high-throughput sequencing analysis.

| Feature ID | Fold Change | Feature ID | Fold Change | Feature ID | Fold Change | Feature ID  | Fold Change | Feature ID   | Fold Change | Feature ID | Fold Change | Feature ID | Fold Change |
|------------|-------------|------------|-------------|------------|-------------|-------------|-------------|--------------|-------------|------------|-------------|------------|-------------|
| ACTB       | -2.07758    | CLDN7      | 2.232537    | GADD45B    | 2.263368    | KLF2        | -2.27501    | PHKB         | 2.839289    | SKP2       | -2.81573    | TUBB2A     | 2.99454     |
| ADM        | 3.160728    | CNP        | -2.05702    | GAS6       | -2.22455    | KLF4        | 4.653922    | PLEKHB1      | -2.43565    | SLC25A1    | -2.3431     | TUBB2B     | 4.423343    |
| AHNAK      | 2.065131    | CST7       | 4.450682    | GDF15      | 3.194813    | KLF5        | 2.144843    | PLK1         | -2.56598    | SLC25A3    | -2.21297    | TUBB6      | 2.239627    |
| AJUBA      | 2.391019    | CTSC       | -2.24172    | GFPT1      | 3.023499    | KLF6        | 2.659073    | PLK2         | 2.205178    | SLC38A2    | 2.431101    | TXNIP      | 3.421452    |
| ALG2       | 2.043911    | CXCL1      | 2.506711    | GIN52      | -2.68603    | KRT80       | 3.050284    | PLK3         | 2.484203    | SLC39A5    | 2.211207    | U47924.25  | -3.63554    |
| AMMECR1L   | 2.005723    | CXCL3      | 2.887086    | GJB1       | -2.70921    | LAMB3       | 3.765683    | PMAI1P1      | 2.353642    | SLC3A2     | 2.692173    | UBE2C      | -2.21596    |
| AP001187.9 | -2.13178    | DBI        | -2.71142    | GLYCTK-AS1 | -2.14439    | LFNG        | -2.96188    | PNRC1        | 2.301964    | SLCO5A1    | 2.424458    | UFM1       | 2.122286    |
| ARG2       | 2.115928    | DDIT3      | 7.711006    | GTPBP2     | 2.575962    | LINC00273_1 | -2.73478    | PPIA29       | 2.070944    | SOC3       | 2.863626    | UGDH       | 2.066333    |
| ARHGGEF2   | 2.015492    | DDIT4      | 8.568872    | H6PD       | -2.12773    | LMNB1       | -2.05754    | PPP1R15A     | 4.787228    | SPRY1      | -2.18017    | UHRF1      | -2.44341    |
| ARL4D      | 2.694686    | DFNB59     | -2.02329    | HAS3       | -2.66823    | LPCAT1      | -2.33035    | PRICKLE4     | -2.09077    | SQSTM1     | 2.943111    | UNC45B     | 2.657014    |
| ARMCX3     | 2.722455    | DHCR24     | -2.19227    | HBEGF      | 2.253939    | LRRC45      | -2.53472    | PRKAB2       | 2.546982    | SRPRB      | 2.388379    | UQCRI10    | -2.15728    |
| ASNS       | 4.93814     | DIO3_1     | -4.38954    | HERPUD1    | 6.36406     | MAFK        | 2.499883    | PROX1        | -2.13559    | SSR3       | 2.659349    | VEGFA      | 5.449445    |
|            |             |            |             |            |             |             |             |              |             | ST6GALNAC  |             |            |             |
| ATF4       | 2.045582    | DIO3OS     | -3.4389     | HES1       | -2.33679    | MANF        | 2.353214    | PRR15        | -2.18479    | 4          | 2.451222    | VIL1       | -2.33878    |
| AURKA      | -2.09949    | DNAJB2     | 2.246194    | HKDC1      | 2.995226    | MARCKSL1    | -2.0962     | PSRC1        | -2.65568    | STC2       | 3.261453    | VIMP       | 2.521853    |
| BHLHA15    | 4.429032    | DNAJB9     | 5.114442    | HMGB3      | -2.96755    | METTL7B     | -2.27247    | PTK7         | -2.52678    | STMN1      | -2.0838     | WARS       | 2.921844    |
| BHLHE40    | 2.884387    | DNAJC10    | 2.265693    | HPDL       | -2.12668    | MIEN1       | -2.26512    | PYGB         | 2.196141    | STRA13     | -2.2898     | WDR34      | -2.04013    |
| C12orf36   | 2.030684    | DPEP1      | -2.61921    | HSP90B1    | 2.367735    | MIR22HG     | 5.492687    | RAB24        | 3.885976    | STX5       | 3.061744    | WDR48      | 2.335005    |
| C17orf61   | -2.3893     | DPM3       | -2.05602    | HSP90B3P   | 2.44931     | MMP17       | 2.116641    | RAC3         | -2.09983    | SUOX       | -2.20896    | XBP1       | 2.443152    |
| C19orf10   | 2.185225    | DPYSL2     | -2.02008    | HSPA13     | 3.086655    | MTHFD2      | 2.318032    | RARRES2      | -2.96488    | TES        | 2.623024    | XPOT       | 2.072542    |
| C19orf79   | -2.15492    | DUSP5      | 3.515618    | HSPA5      | 3.58693     | MYC         | 3.199495    | RBCK1        | 2.007036    | TEX101     | 4.397061    | ZNF165     | 2.463294    |
| C2CD2L     | 2.083776    | EDEM1      | 2.713944    | HSPB1      | -2.82601    | NAMPTL      | 2.562117    | RBMXL2       | 3.419932    | TGOLN2     | -2.09331    | ZNF238     | -2.17149    |
| C6orf15    | -4.08433    | EEF1A2     | 2.307703    | HSPG2      | -2.91393    | NDUFB4      | -2.07659    | RGS16        | 2.623894    | TMCO3      | 2.549943    | ZNF638     | 2.109932    |
| CALM3      | -2.17524    | EFNA1      | 3.00879     | HYOU1      | 2.976841    | NEAT1       | 3.020342    | RIOK3        | 2.473563    | TMEM125    | 4.06289     | ZNF697     | 2.212553    |
| CAPN7      | 2.880887    | EMP1       | 5.70041     | ID2        | -2.85873    | NEU1        | 2.241616    | RP1-151F17.1 | 2.037366    | TMEM165    | -2.09804    | ZNF775     | -2.18456    |
| CARS       | 2.08796     | EPHB6      | -2.0885     | IER3       | 2.175415    | NFE2L1      | 2.228086    | RP1-241P17.4 | -2.04801    | TMEM176A   | -2.83554    | ZSCAN12P1  | 2.384833    |
|            |             |            |             |            |             |             |             | RP5-875O13.  |             |            |             |            |             |
| CBS        | 2.641646    | ERRF1      | 3.477127    | IFI30      | -2.40006    | NFKB2       | 3.250282    | 1            | -2.32935    | TMEM184A   | 2.070981    |            |             |
| CBX4       | 2.986557    | ESYT2      | 2.050808    | IGFBP3     | 2.102866    | NFKBIA      | 2.134665    | RPS26        | -2.05758    | TMEM198    | 2.008101    |            |             |
| CCL20      | 5.47827     | FADS3      | 2.659677    | IL23A      | 3.868468    | NFKBIL1     | 2.461413    | RWDD2A       | 2.300447    | TMEM47     | 2.033338    |            |             |
| CCNB1      | -2.01873    | FAM181B    | 4.930293    | IL8        | 6.075342    | NKD1        | -2.84873    | S100P        | 3.78614     | TMF1       | 2.045248    |            |             |
| CD40LG     | 3.45411     | FAM43A     | -3.62137    | INHBE      | 8.700271    | NKX2-5      | 2.315704    | SARS         | 2.441145    | TNFRSF10B  | 2.364703    |            |             |
| CD46       | -2.38037    | FAM64A     | -2.25523    | IRF1       | 2.777702    | NME3        | -2.63512    | SCT          | 7.18779     | TNS3       | -2.17361    |            |             |
| CDC42EP1   | 3.091704    | FAM84B     | 2.609526    | ISL2       | 2.30928     | NME4        | -2.68709    | SDC4         | 2.62203     | TNS4       | -2.82752    |            |             |

|            |          |        |          |        |          |       |          |         |          |         |          |
|------------|----------|--------|----------|--------|----------|-------|----------|---------|----------|---------|----------|
| CDC6       | 2.051759 | FGF3   | -2.2421  | ITPKA  | 2.645648 | NRL   | 2.334309 | SEC23B  | 2.009418 | TOP2A   | -2.53755 |
| CDH1       | 2.077395 | FGFBP1 | -2.19163 | JAG1   | 2.681247 | NRM   | -2.62004 | SEC61A1 | 2.591368 | TP53I13 | 2.204289 |
| CDK2AP2    | 2.25885  | FGFR4  | -2.48857 | JUNB   | 2.31369  | NTHL1 | -2.00119 | SEL1L   | 3.057737 | TRAM1   | 2.271536 |
| CDKN2AIPNL | -2.05728 | FICD   | 2.117261 | KCNK6  | 2.237997 | PCSK9 | -2.1395  | SEMA3B  | 3.212944 | TRAM1L1 | 2.100343 |
| CEBPB      | 4.242738 | FKBP14 | 2.666328 | KDM6B  | 2.20639  | PCYT2 | -2.00642 | SEPW1P  | -2.20046 | TRIB3   | 4.103893 |
| CEBPG      | 2.761529 | FOS    | 2.784292 | KIF20A | -2.61045 | PDIA4 | 2.172062 | SERP1   | 2.031789 | TSC1    | 2.309849 |
| CITED2     | 2.388019 | FOSL2  | 2.183202 | KIFC1  | -2.03051 | PGM3  | 2.738452 | SFRP5   | -2.95571 | TSPYL2  | 2.963513 |
| CKLF       | -2.0102  | FSTL3  | 2.272113 | KLC3   | 2.594465 | PHF19 | -2.16746 | SHMT2   | 2.178495 | TTL1    | 3.940955 |

Two hundred sixty-five mRNAs were observed to exhibit changes that were statistically significant and >2-fold in comparison to the control cells (n=3).

Supplementary Table 3 The pathway analysis by the MetaCore software program.

| #  | Maps                                                                                        | p-value  | Network Objects from Active Data                                                                                                     |
|----|---------------------------------------------------------------------------------------------|----------|--------------------------------------------------------------------------------------------------------------------------------------|
| 1  | <u>Apoptosis and survival_Endoplasmic reticulum stress response pathway</u>                 | 6.98E-08 | ATF-4, Endoplasmic reticulum stress response pathway, GADD34, I-kB, EDEM, HERP, XBP1, CDC18L (CDC6), CDH1, SKP2, Cyclin B, Aurora-A, |
| 2  | <u>Cell cycle_Role of APC in cell cycle regulation</u>                                      | 5.12E-06 | PLK1                                                                                                                                 |
| 3  | <u>Apoptosis and survival_Role of PKR in stress-induced apoptosis</u>                       | 9.34E-06 | ATF-4, IRF1, C/EBP zeta, NFKBIA, I-kB, NF-kB, c-Myc                                                                                  |
| 4  | <u>Immune response_MIF-mediated glucocorticoid regulation</u>                               | 1.21E-05 | NFKBIA, I-kB, NF-kB, IL-8, c-Fos                                                                                                     |
| 5  | <u>Development_Glucocorticoid receptor signaling</u>                                        | 1.90E-05 | HSP90, HSP70, NFKBIA, NF-kB, C/EBPbeta                                                                                               |
| 6  | <u>Immune response_IL-17 signaling pathways</u>                                             | 2.15E-05 | CCL20, GRO-1, I-kB, NF-kB, C/EBPbeta, IL-8, c-Fos                                                                                    |
| 7  | <u>IGF family signaling in colorectal cancer</u>                                            | 2.15E-05 | IBP, I-kB, NF-kB, VEGF-A, IL-8, IBP3, c-Fos                                                                                          |
| 8  | <u>Apoptosis and survival_Anti-apoptotic TNFs/NF-kB/Bcl-2 pathway</u>                       | 2.63E-05 | NF-kB2 (p100), Sequestosome 1(p62), NF-kB2 (p52), I-kB, NF-kB, CD40L(TNFSF5)                                                         |
| 9  | <u>FGF signaling in pancreatic cancer</u>                                                   | 4.49E-05 | NFKBIA, E-cadherin, NF-kB, HBP17, VEGF-A, c-Fos                                                                                      |
| 10 | <u>p53 signaling in Prostate Cancer</u>                                                     | 9.57E-05 | DR4(TNFRSF10A), Stathmin, NOXA, DR5(TNFRSF10B), IBP3                                                                                 |
| 11 | <u>LRRK2 in neurons in Parkinson's disease</u>                                              | 9.57E-05 | HSP90, eEF1A2, ACTB, eEF1A, Actin cytoskeletal                                                                                       |
| 12 | <u>Cell cycle_ESR1 regulation of G1/S transition</u>                                        | 9.57E-05 | SKP2, NCOA3 (pCIP/SRC3), c-Myc, Skp2/TrCP/FBXW, c-Fos                                                                                |
| 13 | <u>Immune response_Lipoxins and Resolvin E1 inhibitory action on neutrophil functions</u>   | 1.28E-04 | NFKBIA, I-kB, NF-kB, IL-8, c-Fos                                                                                                     |
| 14 | <u>Immune response_Role of PKR in stress-induced antiviral cell response</u>                | 1.53E-04 | IRF1, NFKBIA, I-kB, NF-kB, IL-8, c-Myc                                                                                               |
| 15 | <u>Development_ERBB-family signaling</u>                                                    | 2.17E-04 | HB-EGF, I-kB, NF-kB, c-Myc, c-Fos                                                                                                    |
| 16 | <u>Immune response_TSLP signalling</u>                                                      | 2.17E-04 | NFKBIA, Claudin-7, NF-kB, IL-8, c-Myc                                                                                                |
| 17 | <u>Immune response_Neurotensin-induced activation of IL-8 in colonocytes</u>                | 3.09E-04 | I-kB, NF-kB, Calmodulin, IL-8, c-Fos                                                                                                 |
| 18 | <u>Development_Role of IL-8 in angiogenesis</u>                                             | 3.17E-04 | HB-EGF, I-kB, NF-kB, VEGF-A, IL-8, c-Fos                                                                                             |
| 19 | <u>Impaired inhibitory action of lipoxins and Resolvin E1 on neutrophil functions in CF</u> | 3.46E-04 | NFKBIA, I-kB, NF-kB, IL-8, c-Fos                                                                                                     |
| 20 | <u>Signal transduction_AKT signaling</u>                                                    | 3.46E-04 | HSP90, Hamartin, I-kB, NF-kB, c-Myc                                                                                                  |

The endoplasmic reticulum stress response pathway was dramatically altered in the ferrichrome-treated cells (n=3).

Supplementary Table 4 The list of endoplasmic reticulum stress markers that were significantly changed by the related molecules

| Gene Symbol              | Object Type             | Description                                                                                                   | Integrity Biomarker                                                                                           | Signal (fold change) | P-value  |
|--------------------------|-------------------------|---------------------------------------------------------------------------------------------------------------|---------------------------------------------------------------------------------------------------------------|----------------------|----------|
| <a href="#">DDIT3</a>    | Transcription factor    | <a href="#">DNA damage-inducible transcript 3 protein</a>                                                     | <a href="#">DNA-damage-inducible transcript 3</a>                                                             | 7.711006             | 1.05E-04 |
| <a href="#">HERPUD1</a>  | Generic binding protein | <a href="#">Homocysteine-responsive endoplasmic reticulum-resident ubiquitin-like domain member 1 protein</a> | <a href="#">Homocysteine-responsive endoplasmic reticulum-resident ubiquitin-like domain member 1 protein</a> | 6.36406              | 1.37E-04 |
| <a href="#">PPP1R15A</a> | Generic binding protein | <a href="#">Protein phosphatase 1 regulatory subunit 15A</a>                                                  | <a href="#">Protein phosphatase 1 regulatory subunit 15A</a>                                                  | 4.787228             | 2.70E-04 |
| <a href="#">HSPA5</a>    | Generic binding protein | <a href="#">78 kDa glucose-regulated protein</a>                                                              | <a href="#">Heat shock 70kDa protein 5 (glucose-regulated protein, 78kDa)</a>                                 | 3.58693              | 4.49E-04 |
| <a href="#">EDEMI</a>    | Generic enzyme          | <a href="#">ER degradation-enhancing alpha-mannosidase-like protein 1</a>                                     | <a href="#">ER degradation-enhancing alpha-mannosidase-like 1</a>                                             | 2.713944             | 1.09E-03 |
| <a href="#">XBP1</a>     | Transcription factor    | <a href="#">X-box-binding protein 1</a>                                                                       | <a href="#">X-box-binding protein 1</a>                                                                       | 2.443152             | 9.49E-05 |
| <a href="#">HSP90B1</a>  | Generic binding protein | <a href="#">Endoplasmin</a>                                                                                   | <a href="#">Endoplasmin</a>                                                                                   | 2.367735             | 2.89E-04 |
| <a href="#">NFKBIA</a>   | Generic binding protein | —                                                                                                             | <a href="#">Nuclear factor of kappa light polypeptide gene enhancer in B-cells inhibitor, alpha</a>           | 2.134665             | 4.07E-04 |
| <a href="#">ATF4</a>     | Transcription factor    | <a href="#">Cyclic AMP-dependent transcription factor ATF-4</a>                                               | <a href="#">Cyclic AMP-dependent transcription factor ATF-4</a>                                               | 2.045582             | 7.35E-04 |

ER stress-responsive molecules, including DNA damage-inducible transcript 3 (DDIT3) and 78 kDa glucose-regulated protein, were significantly upregulated in the ferrichrome-treated cells (n=3).
